# Supplementary material
Source: PubMed Central journal article supplement (PMC6675451)

**Appendix**  
**Feasibility of Text Message Influenza Vaccine Safety Monitoring During Pregnancy**  
**Stockwell et al.**

**Appendix Table 1.** Non-Pregnancy Events Post Influenza Vaccination Reported via Text Message and in the Electronic Medical Record

| Day/Number of non-pregnancy events identified | Source <sup>a</sup>                 |                                   |
|-----------------------------------------------|-------------------------------------|-----------------------------------|
|                                               | Text report (with EMR confirmation) | No text report, documented in EMR |
| <b>Day 0-7</b>                                |                                     |                                   |
| 1 fever                                       | 1 text (with 1 EMR)                 |                                   |
| 4 upper respiratory infection                 | 4 text (with 0 EMR)                 |                                   |
| 2 nausea/vomiting                             | 2 text (with 1 EMR)                 |                                   |
| 1 epilepsy                                    | 1 text (with 1 EMR)                 |                                   |
| 1 headache                                    | 1 text (with 1 EMR)                 |                                   |
| 1 genetic exam                                | 1 text (with 1 EMR)                 |                                   |
| <b>Days 8-14</b>                              |                                     |                                   |
| 2 fever                                       | 2 text (with 0 EMR)                 |                                   |
| 1 upper respiratory infection                 | 1 text (with 0 EMR)                 |                                   |
| 2 nausea/vomiting                             | 2 text (with 0 EMR)                 |                                   |
| 1 constipation                                | 1 text (with 0 EMR)                 |                                   |
| 2 headache                                    | 2 text (with 0 EMR)                 |                                   |
| 1 genetic exam                                | 1 text (with 1 EMR)                 |                                   |
| 1 sickle cell crisis                          | 1 text (with 1 EMR)                 |                                   |
| <b>Days 15-28</b>                             |                                     |                                   |
| <b>1 fever</b>                                | 1 text (with 0 EMR)                 |                                   |
| 5 upper respiratory infection                 | 3 text (with 2 EMR)                 | 2 additional in EMR               |
| 2 headache                                    | 2 text (with 1 EMR)                 |                                   |
| 2 urinary tract infection                     | 0 text                              | 2 EMR                             |
| 1 fall                                        | 0 text                              | 1 EMR                             |
| 1 rash                                        | 0 text                              | 1 EMR                             |
| 1 palpitation                                 | 0 text                              | 1 EMR                             |
| <b>Days 29-42</b>                             |                                     |                                   |
| <b>2 fever</b>                                | 2 text (with 0 EMR)                 |                                   |
| 2 urinary tract infection                     | 1 text (with 1 EMR)                 | 1 additional in EMR               |
| 3 vaginal candidiasis                         | 1 text (with 1 EMR)                 | 2 additional in EMR               |
| 1 headache                                    | 1 text (with 1 EMR)                 |                                   |
| 1 allergy                                     | 1 text (with 0 EMR)                 |                                   |
| 1 genetic exam                                | 1 text (with 1 EMR)                 |                                   |
| 1 palpitation                                 | 0 text                              | 1 EMR                             |
| 1 upper respiratory infection                 | 0 text                              | 1 EMR                             |
| 1 nausea/vomiting                             | 0 text                              | 1 EMR                             |
| <b>Days 43-70</b>                             |                                     |                                   |
| 2 upper respiratory infection                 | 1 text (with 0 EMR)                 | 1 additional in EMR               |
| 4 urinary tract infection                     | 2 text (with 2 EMR)                 | 2 additional in EMR               |
| 2 gastrointestinal problems                   | 1 text (with 1 EMR)                 | 1 additional in EMR               |
| 2 headache                                    | 1 text (with 0 EMR)                 | 1 additional in EMR               |
| 1 seizure                                     | 1 text (with 1 EMR)                 |                                   |
| 1 dehydration                                 | 1 text (with 1 EMR)                 |                                   |

**Appendix**  
**Feasibility of Text Message Influenza Vaccine Safety Monitoring During Pregnancy**  
**Stockwell et al.**

|                                 |                     |                      |
|---------------------------------|---------------------|----------------------|
| 1 palpitations                  | 0 text              | 1 EMR                |
| 1 vaginal candidiasis           | 0 text              | 1 EMR                |
| 1 rash                          | 0 text              | 1 EMR                |
| 1 syncope                       | 0 text              | 1 EMR                |
| Days 71-249                     |                     |                      |
| <b>6 fever</b>                  | 3 text (with 2 EMR) | 3 additional in EMR  |
| 13 upper respiratory infection  | 3 text (with 1 EMR) | 10 additional in EMR |
| 3 urinary tract infection       | 0 text              | 3 additional in EMR  |
| 5 vaginal candidiasis/discharge | 1 text (with 1 EMR) | 4 additional in EMR  |
| 6 gastrointestinal problems     | 4 text (with 2 EMR) | 2 additional in EMR  |
| 5 syncope/presyncope            | 3 text (with 1 EMR) | 2 additional in EMR  |
| 5 palpitations                  | 1 text (with 1 EMR) | 4 additional in EMR  |
| 2 headache                      | 0 text              | 2 additional in EMR  |
| 2 motor vehicle accident        | 1 text (with 0 EMR) | 1 additional in EMR  |
| 1 otitis externa                | 1 text (with 1 EMR) |                      |
| 1 oral candidiasis              | 1 text (with 1 EMR) |                      |
| 1 shingles                      | 1 text (with 0 EMR) |                      |
| 1 seizure                       | 1 text (with 1 EMR) |                      |
| 1 asthma exacerbation           | 1 text (with 1 EMR) |                      |
| 1 muscle strain                 | 1 text (with 1 EMR) |                      |
| 1 sickle cell crisis            | 1 text (with 1 EMR) |                      |
| 5 rash                          | 0 text              | 5 EMR                |
| 2 breast lump                   | 0 text              | 2 EMR                |
| 1 scalp laceration              | 0 text              | 1 EMR                |

*Note:* Boldface indicates events reported via a pre-specified text message response; non-bolded text indicates events reported via free text. Each event is unique within the time period indicated, but may occur for a given person in multiple time periods.

<sup>a</sup> Text: reported by text message; EMR: Documented in electronic medical record

**Appendix**  
**Feasibility of Text Message Influenza Vaccine Safety Monitoring During Pregnancy**  
**Stockwell et al.**

**Appendix Table 2.** Pregnancy Outcomes Verifiable on Electronic Medical Record Review For Those Who Completed the Text Messaging Program Versus Those Who Stopped or Never Replied For Outcomes

| Pregnancy and neonatal outcomes | Completed text message responses | Stopped/Never responded to text messages |
|---------------------------------|----------------------------------|------------------------------------------|
|                                 | n/N (%)<br>95% CI <sup>a</sup>   | n/N (%)<br>95% CI <sup>a</sup>           |
| Delivered                       | 115/123 (93.5)<br>87.7-96.7      | 20/21 (95.2)<br>77.3-99.2                |
| Pregnancy loss                  | 8/123 (6.5)<br>3.3-12.3          | 1/21 (4.8)<br>0.85-22.7                  |
| Preterm birth                   | 8/115 (7.0)<br>3.6-13.1          | 2/20 (10.0)<br>2.8-30.1                  |
| Low birth weight                | 12/120 (10.0)<br>5.8-16.7        | 2/22 (9.1)<br>2.5-27.8                   |
| Small-for-gestational age       | 9/120 (7.5)<br>4.0-13.6          | 2/22 (9.1)<br>2.5-27.8                   |
| Major birth defects             | 2/120 (1.7)<br>0.5-5.9           | 2/22 (9.1)<br>2.5-27.8                   |

*Note:* Delivery and pregnancy loss are per pregnancy; preterm birth, birth weight, small-for-gestational age, and birth defects are per newborn.

<sup>a</sup>95% CIs are intervals around proportion point estimate

**Appendix**  
**Feasibility of Text Message Influenza Vaccine Safety Monitoring During Pregnancy**  
**Stockwell et al.**

**Appendix Figure 1.** Study flow for enrollment.

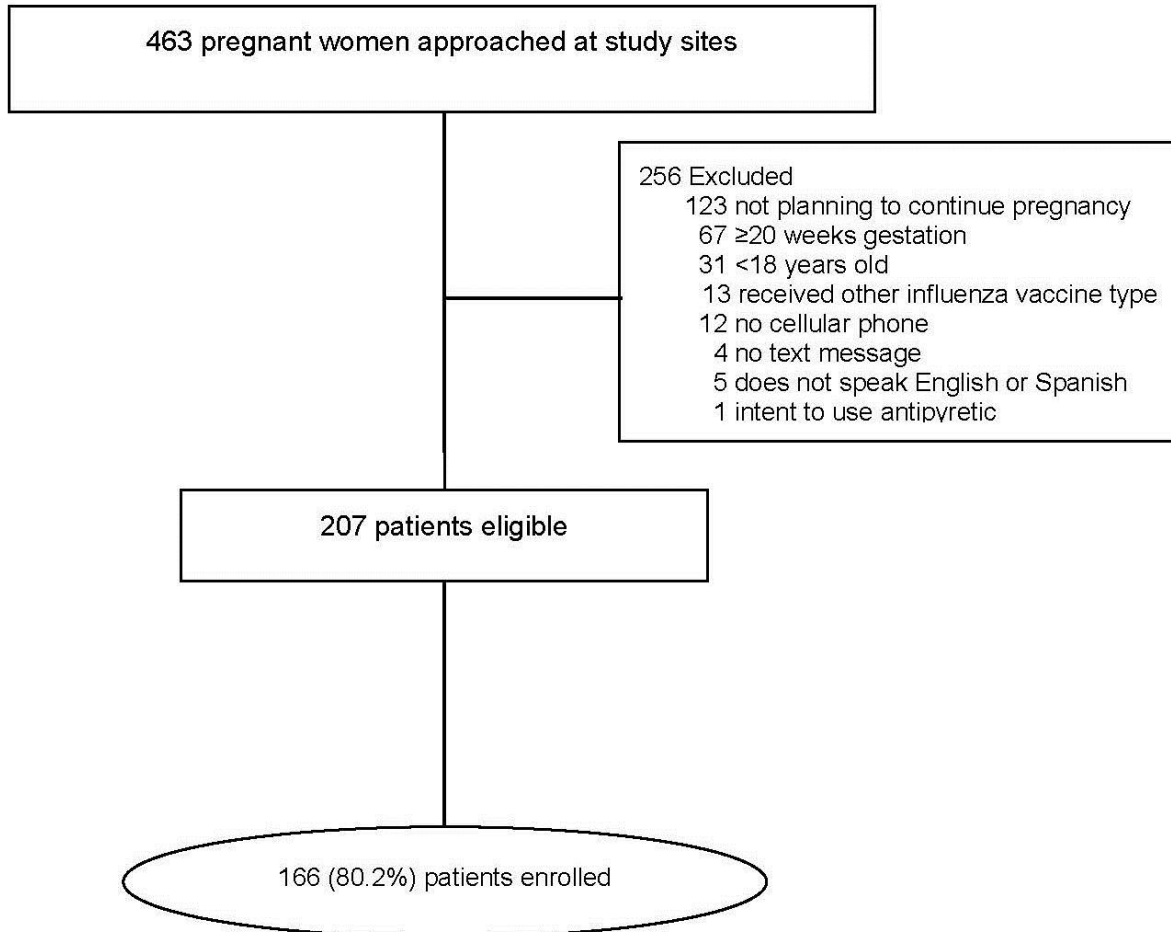

Supplement: NIHMS1028377-supplement-Supplementary_materials.pdf [file NIHMS1028377-supplement-Supplementary_materials.pdf]
